# Supplementary material for: Electroanalytical sensing of the antimicrobial drug linezolid utilising an electrochemical sensing platform based upon a multiwalled carbon nanotubes/bromocresol green modified carbon paste electrode
Source: Royal Society of Chemistry journal article supplement (doi:10.1039/c6ay00454g), 2016-01-01

### ESI Figure 1.

Nyquist plot recorded using the redox probe  $\text{Fe}(\text{CN})_6^{3-/4-}$  / 0.1 M KCl at CPE, BCG/CPE and MWCNT/BCG/CPE. Inset: circuit for the electrochemical impedance spectroscopy data. The frequency range is from 100 mHz to 100 kHz. The inset shows the equivalent circuit.

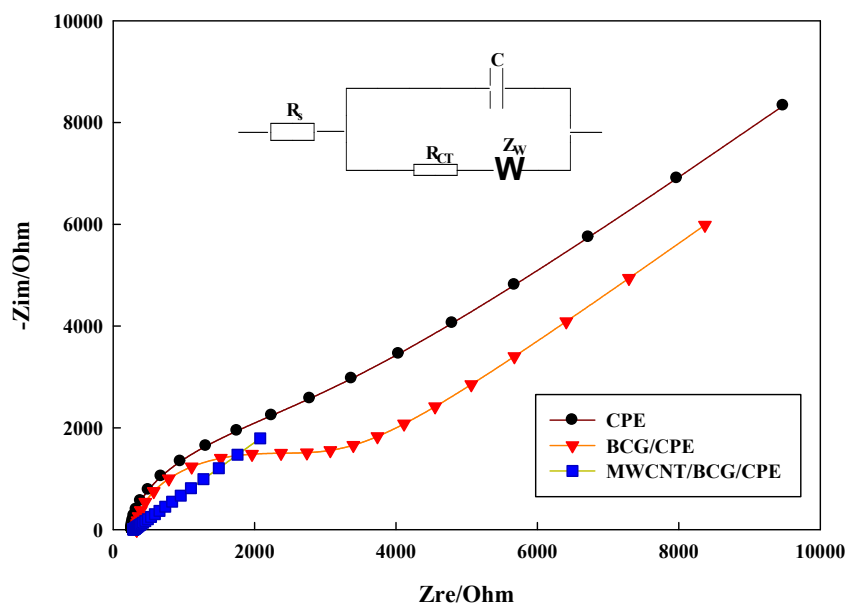

## ESI Figure 2.

(A) Cyclic voltammograms of  $1.0 \times 10^{-3}$  mol L<sup>-1</sup> LIN in pH 7 buffer using a MWCNT/BCG/CPE sensor recorded at various scan rates: 10-100 mVs<sup>-1</sup>. Inset A: plot of  $I_p$  vs.  $v^{1/2}$ . Inset B: plot of  $E_p$  vs.  $\log v$ .

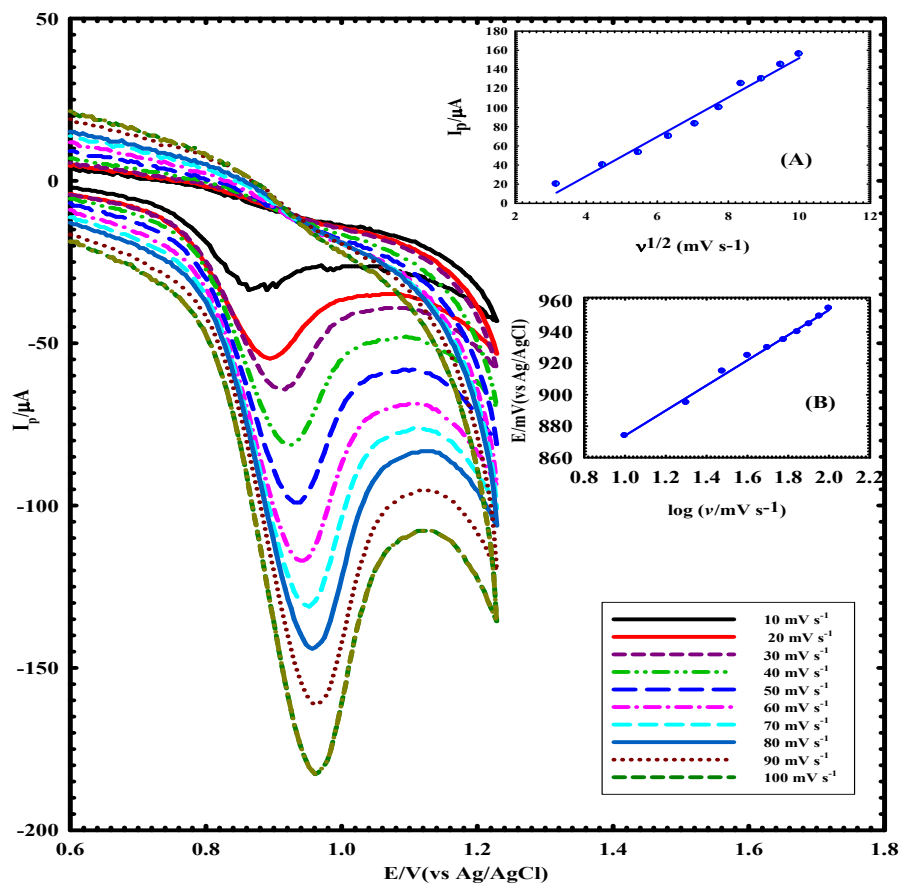

### ESI Figure 3.

Chronoamperograms for the electrochemical oxidation of different concentrations LIN using a MWCNT/BCG/CPE sensor in a pH 7 buffer. Potential step: +0.950 V vs. Ag/AgCl. The numbers 1 to 5 in the Cottrell plot (inset A) correspond to 2.50, 25.00, 50, 100.00 and 125.00  $\times 10^{-6}$  mol L<sup>-1</sup> of LIN, respectively. Inset B shows the variation of chronoamperometric currents at  $t = 30$  s vs. LIN concentration.

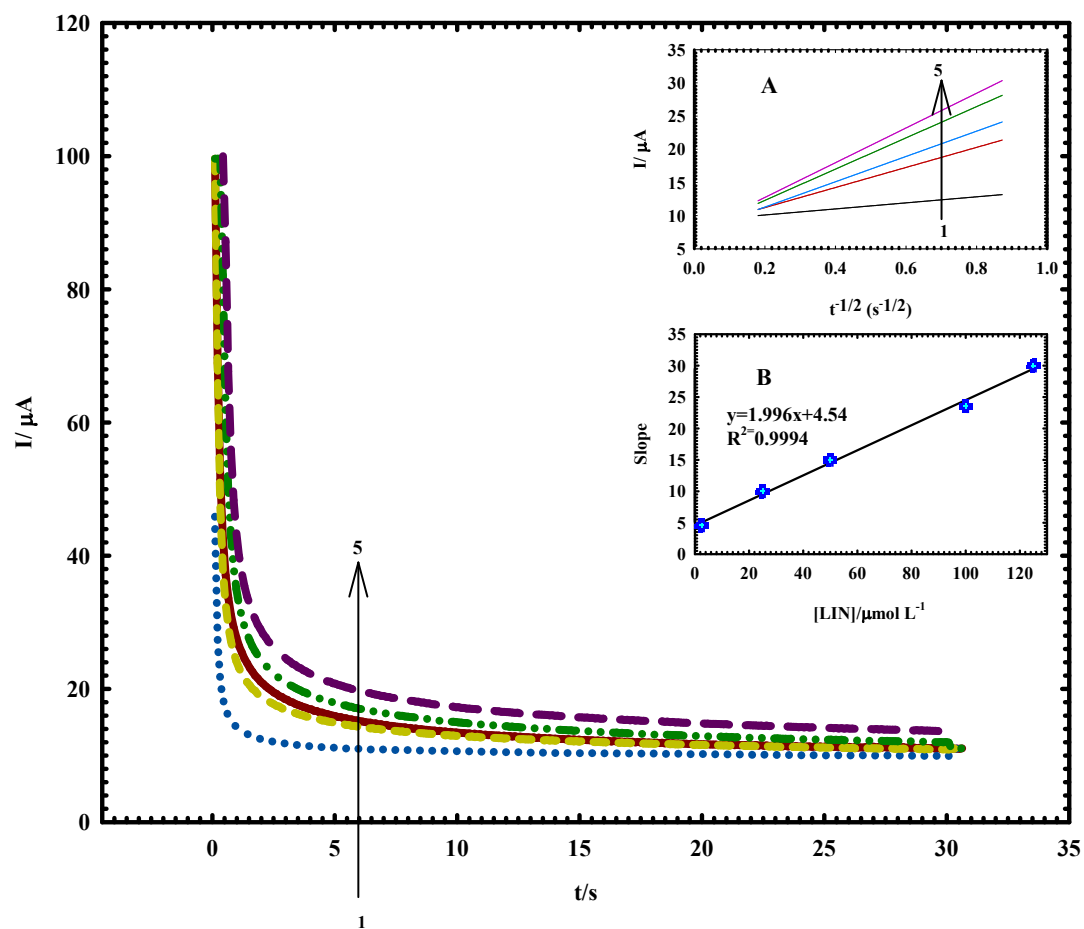

**ESI Figure 4.**

DPV of MWCNT/BCG/CPE in a pH 7 buffer containing  $10 \mu\text{mol L}^{-1}$  LIN in the presence of AA ( $49 \mu\text{mol L}^{-1}$ ) and UA ( $137 \mu\text{mol L}^{-1}$ ). Scan rate:  $10 \text{ mV/s}$ .

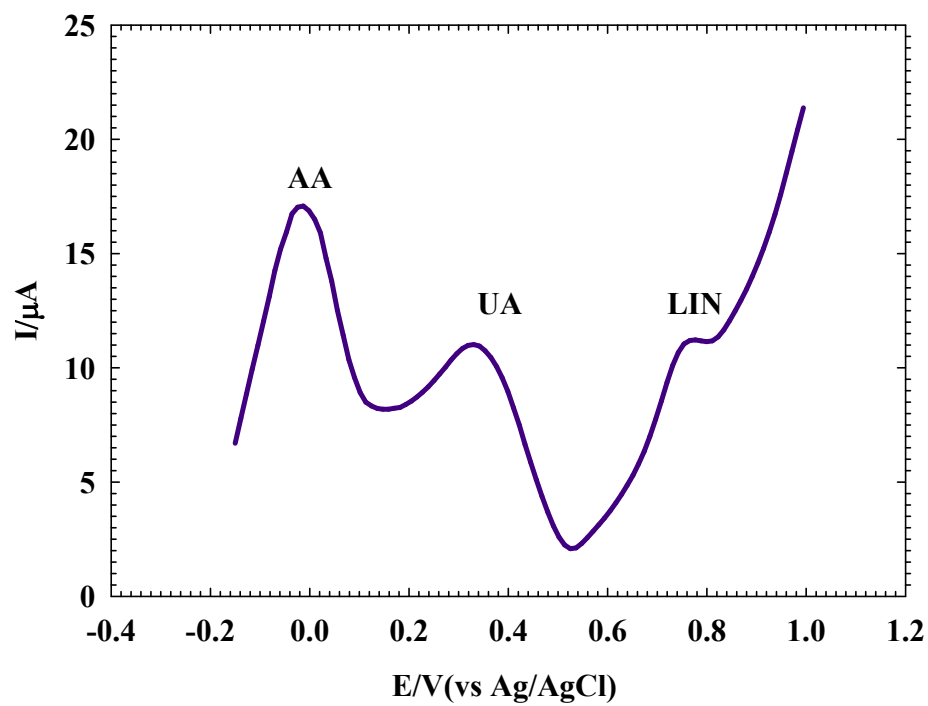

Supplement: c6ay00454g1.pdf [file c6ay00454g1.pdf]
